# Supplementary material for: (Z)3,4,5,4′-trans-tetramethoxystilbene, a new analogue of resveratrol, inhibits gefitinb-resistant non-small cell lung cancer via selectively elevating intracellular calcium level
Source: PubMed Central journal article supplement (PMC4635386; doi:10.1038/srep16348), 2015-11-06
Supplement: srep16348-s1.pdf [file srep16348-s1.pdf]

**Title:** (Z)3,4,5,4'-trans-tetramethoxystilbene, a new analogue of resveratrol, inhibits gefitinb-resistant non-small cell lung cancer via selectively elevating intracellular calcium level

**Author list:** Xing-Xing Fan, Xiao-Jun Yao, Su Wei Xu, Vincent Kam-Wai Wong, Jian-Xing He, Jian Ding, Wei-Wei Xue, Tahira Mujtaba, Francesco Michelangeli, Min Huang, Jun Huang, Da-Kai Xiao, Ze-Bo Jiang, Yan-Ling Zhou, Richard Kin-Ting Kam, Liang Liu and Elaine Lai-Han Leung

# Supplementary figure 1

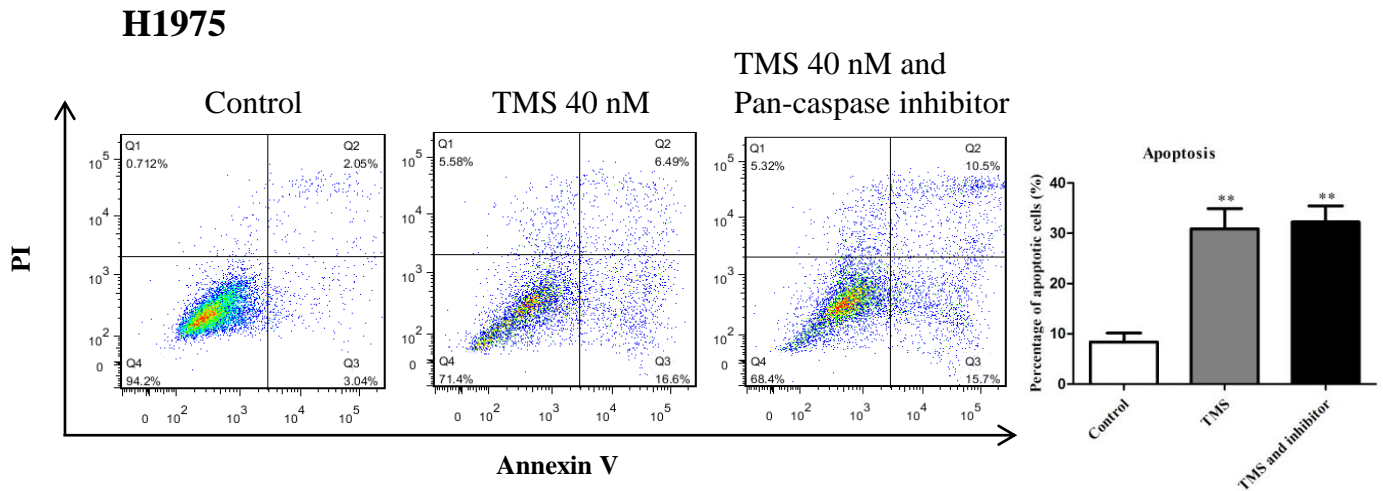

**Supplementary Figure 1.** Pan-caspase inhibitor failed to block the apoptotic effect on H1975 induced by TMS.

## Supplementary figure 2

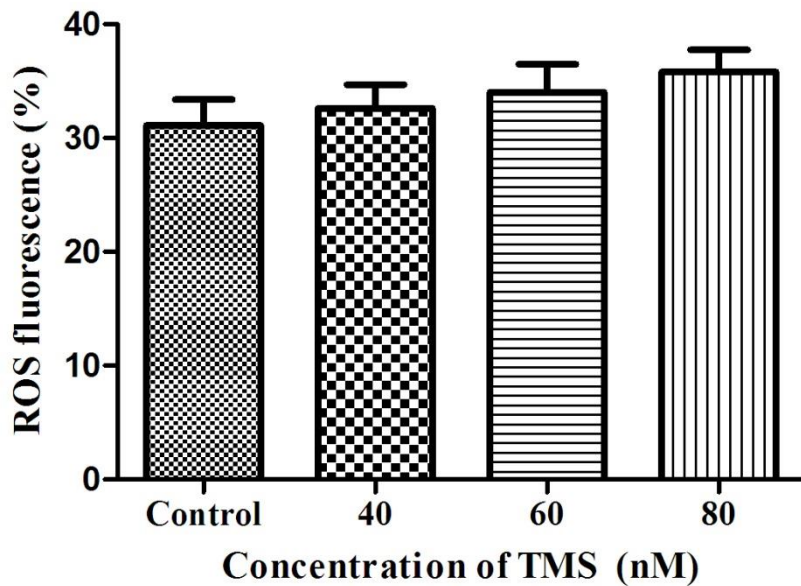

**Supplementary Figure 2.** TMS didn't significantly increase the generation of ROS in H1975.

# Supplementary figure 3

**a**

Root mean square deviations (RMSD) of heavy atoms in backbone of SERCA during Molecular Dynamic simulations.

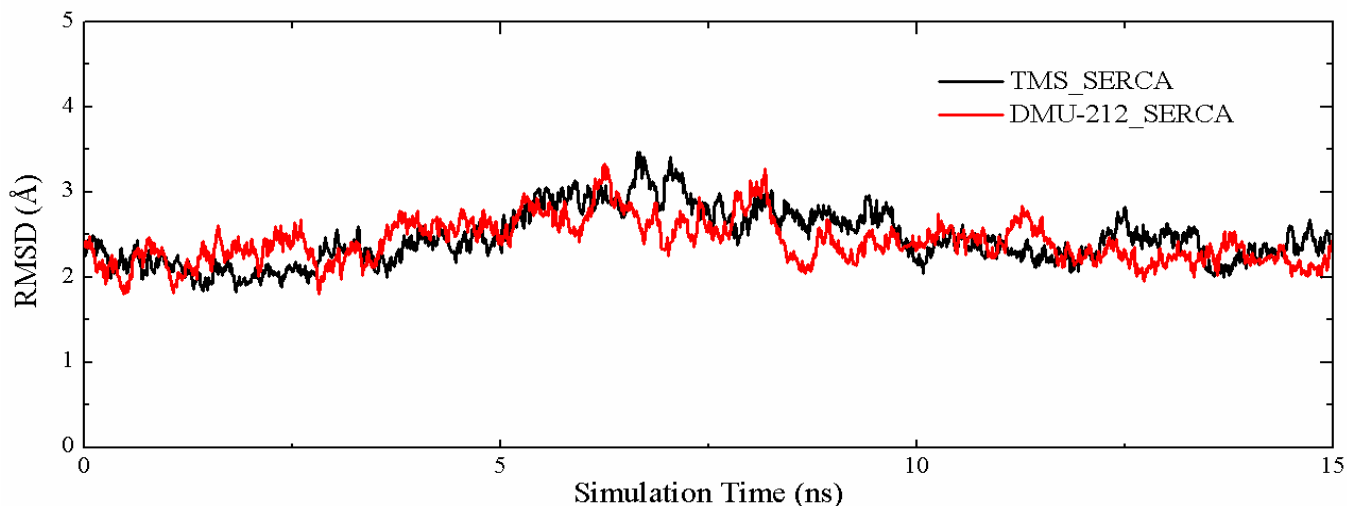

**b**

The calculated binding free energies of TMS and DMU-212 to SERCA (All energies are in kcal/mol)

| Drugs   | $\Delta E_{\text{ele}}$ | $\Delta E_{\text{vdw}}$ | $\Delta G_{\text{pol}}$ | $\Delta G_{\text{nonpol}}$ | $\Delta G_{\text{MMGBSA}}$ |
|---------|-------------------------|-------------------------|-------------------------|----------------------------|----------------------------|
| TMS     | $-4.04 \pm 0.06$        | $-40.27 \pm 0.11$       | $10.27 \pm 0.06$        | $-5.37 \pm 0.02$           | $-39.41 \pm 0.12$          |
| DMU-212 | $-5.78 \pm 0.11$        | $-38.77 \pm 0.10$       | $11.92 \pm 0.10$        | $-5.57 \pm 0.01$           | $-38.21 \pm 0.11$          |

**Supplementary Figure 3.** Molecular dynamic simulation analysis the interaction of TMS and DMU-212 with SERCA. (a) Root mean square deviations (RMSD) of heavy atoms in backbone of SERCA during molecular dynamic stimulation. (b) The calculated binding free energies of TMS and DMU-212 to SERCA (All energies are in kcal/mol).

# Supplementary figure 4

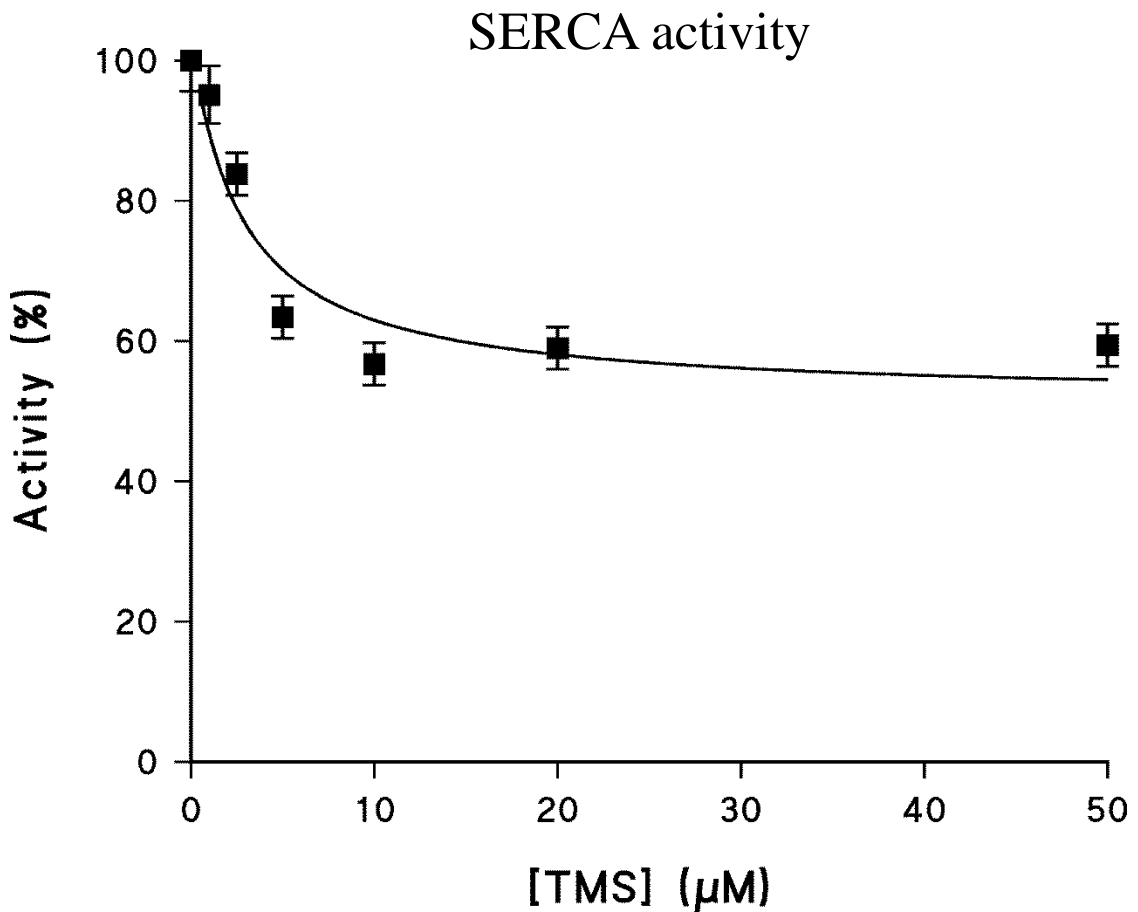

**Supplementary Figure 4.** TMS inhibited the enzyme activity of SERCA.

# Supplementary figure 5

**a**

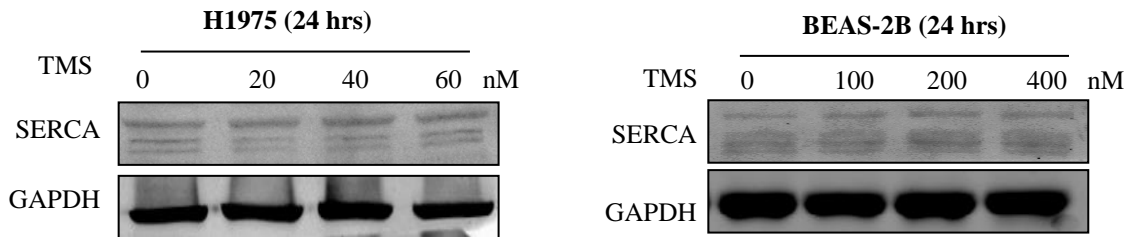

**b**

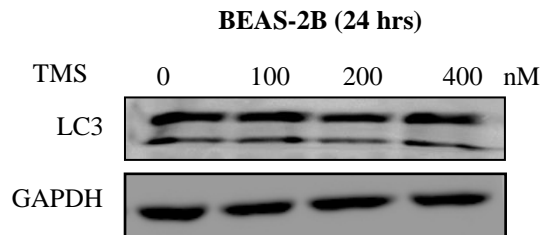

**Supplementary Figure 5.** TMS has no effect on SERCA expression and autophagy in normal BEAS-2B cell. (a) TMS didn't alter the expression of SERCA in both normal BEAS-2B cell and NSCLC H1975 cell. (b) TMS didn't induce autophagy in BEAS-2B. LC3-II remained the same after TMS treatment.
